# Supplementary material for: Synthesis and thermochromic properties of vanadium dioxide colloidal particles
Source: Royal Society of Chemistry journal article supplement (doi:10.1039/c1jm12430g), 2011-01-01
Supplement: c1jm12430g.pdf [file c1jm12430g.pdf]

*Supporting Information*

**Synthesis and Thermo-chromic Properties of Vanadium  
Dioxide Colloidal Particles**

Zhenda Lu,<sup>a</sup> Chunguang Li,<sup>a,b</sup> Yadong Yin<sup>\*a</sup>

<sup>a</sup>Department of Chemistry, University of California, Riverside, CA, USA, 92521; <sup>b</sup>State Key Laboratory of Inorganic Synthesis & Preparative Chemistry, Jilin University, Changchun 130012, P. R. China

\*To whom correspondence should be addressed. E-mail: yadong.yin@ucr.edu.

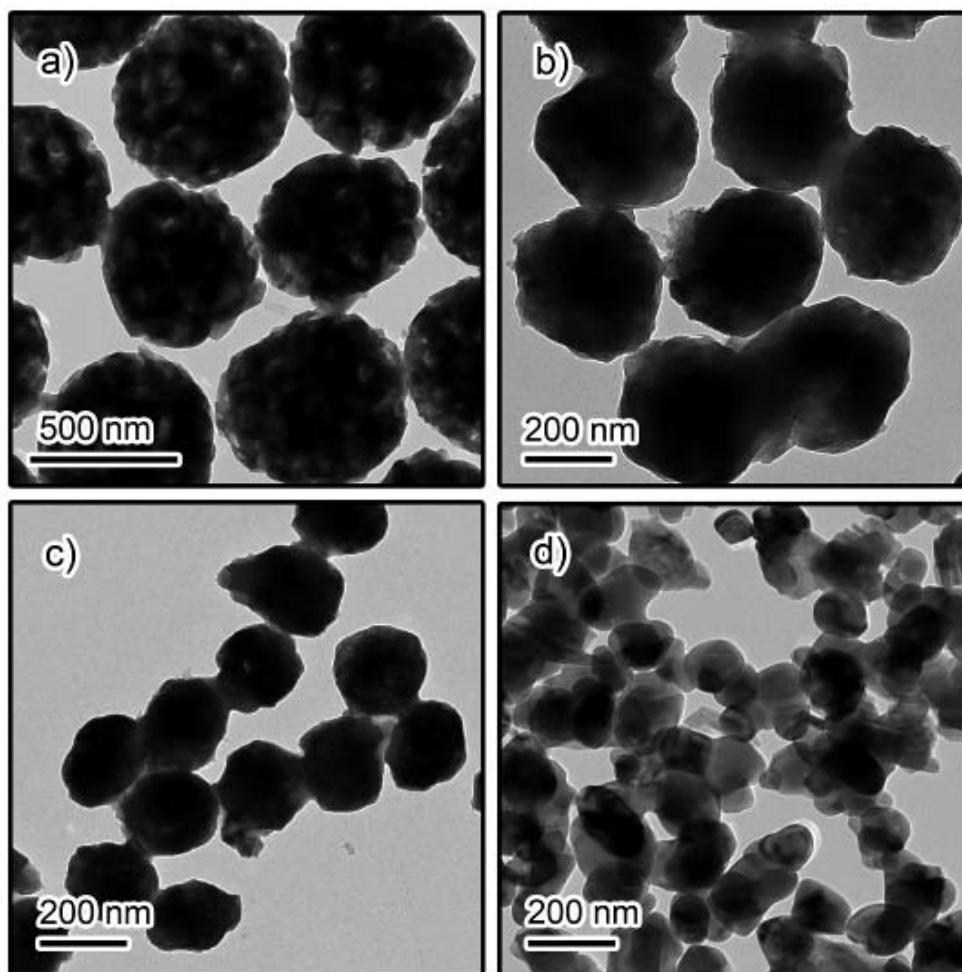

**Fig. S1.** TEM images of VO<sub>2</sub> particles with different sizes.

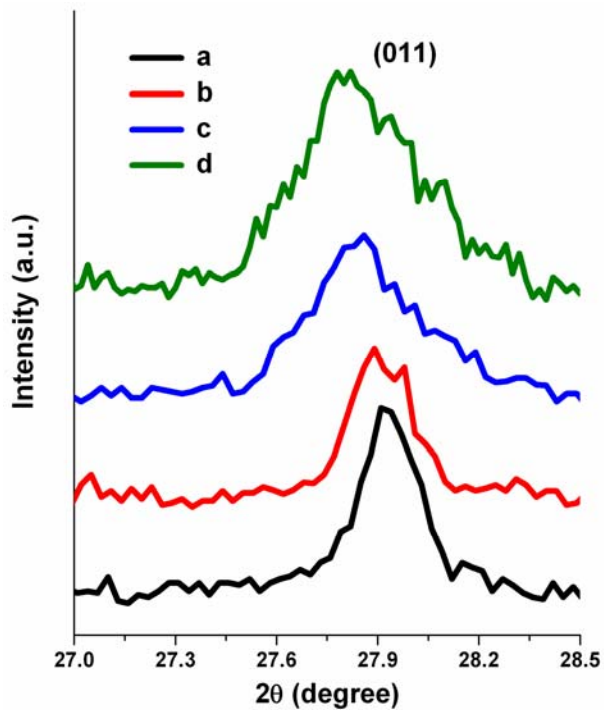

**Fig. S2.** {011} reflection in XRD patterns of VO<sub>2</sub> particles with an average diameter of a) 540 nm, b) 304 nm, c) 208 nm and d) 150 nm.
